# Supplementary material for: Moderate activation of IKK2-NF-kB in unstressed adult mouse liver induces cytoprotective genes and lipogenesis without apparent signs of inflammation or fibrosis
Source: Springer Nature journal article supplement (doi:10.1186/s12876-015-0325-z), 2015-07-28
Supplement: MOESM2 [file 9738274]

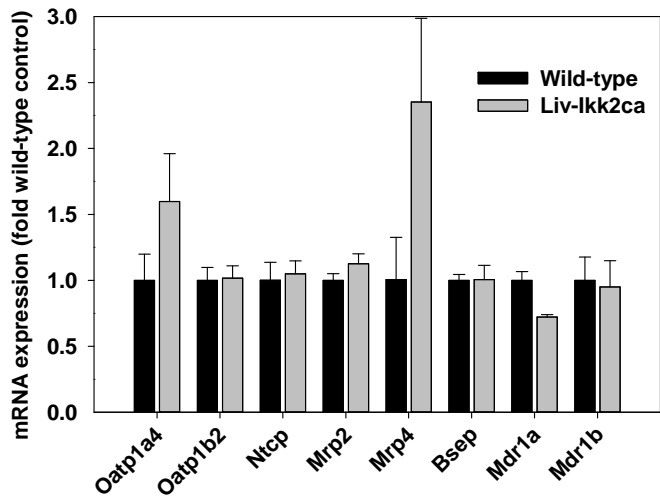

**Additional file 2. Hepatic mRNA expression of major bile acid transporters in adult male mice with hepatocyte-specific activation of Ikk2 (Liv-Ikk2ca).** N=6, mean  $\pm$  SE. Ntcp: Na<sup>+</sup>-taurocholate cotransporting polypeptide; Bsep: bile salt export pump; Mrp2: multi-drug resistance-associated protein 2.
