# Supplementary material for: Moderate activation of IKK2-NF-kB in unstressed adult mouse liver induces cytoprotective genes and lipogenesis without apparent signs of inflammation or fibrosis
Source: Springer Nature journal article supplement (doi:10.1186/s12876-015-0325-z), 2015-07-28
Supplement: MOESM3 [file 9738274]

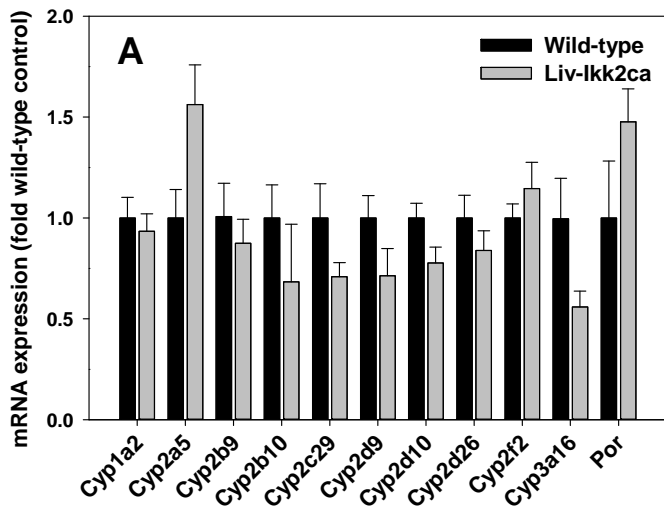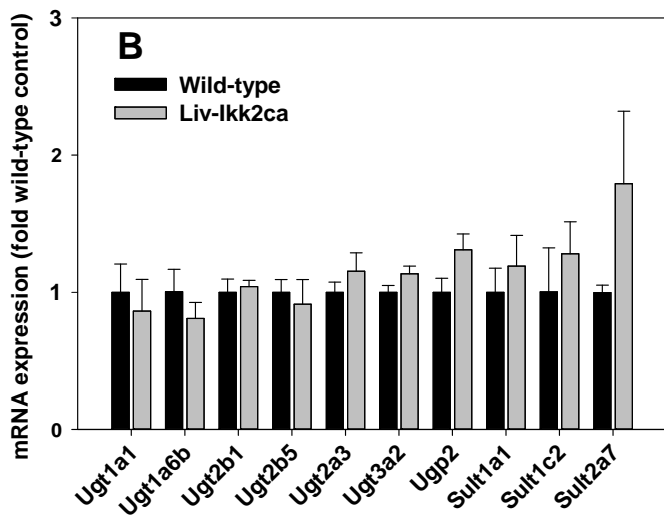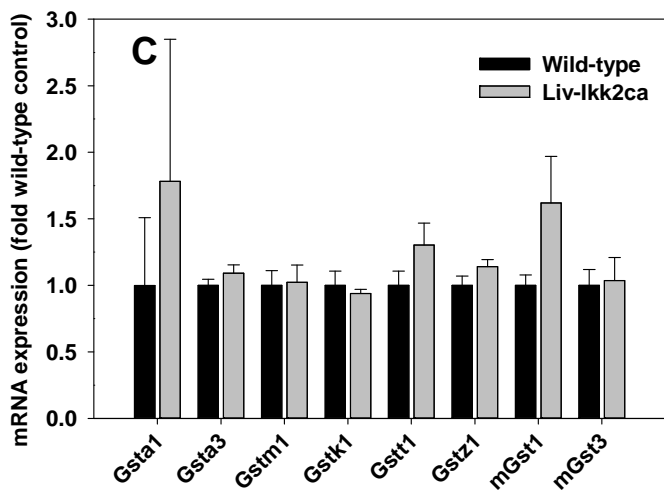

**Additional file 3. Hepatic mRNA expression of major drug metabolizing enzymes in adult male mice with hepatocyte-specific activation of Ikk2 (Liv-Ikk2ca). N=6, mean  $\pm$  SE.**
